# Supplementary material for: Transient T-bet expression functionally specifies a distinct T follicular helper subset
Source: PubMed Central journal article supplement — J Exp Med. 2018 Nov 5;215(11):2705–14. doi: 10.1084/jem.20180927 (PMC6219743; doi:10.1084/jem.20180927), 2018-11-05
Supplement: JEM_20180927_sm.pdf [file JEM_20180927_sm.pdf]

Supplemental material

Fang et al., <https://doi.org/10.1084/jem.20180927>

Tables S1 and S2 are included as separate Excel files. Table S1 shows differentially expressed genes between CD4<sup>+</sup>CD44<sup>high</sup>CD25<sup>-</sup>tdTomato<sup>+</sup>ZsGreen<sup>+</sup> and CD4<sup>+</sup>CD44<sup>high</sup>CD25<sup>-</sup>tdTomato<sup>+</sup>ZsGreen<sup>-</sup> cell populations. Table S2 show differentially expressed genes in CD4<sup>+</sup>CD44<sup>high</sup>CD25<sup>-</sup>Tetramer<sup>+</sup>-CXCR5<sup>high</sup>PD-1<sup>high</sup>tdTomato<sup>+</sup>, CXCR5<sup>high</sup>PD-1<sup>high</sup>tdTomato<sup>-</sup>, CXCR5<sup>low</sup>PD-1<sup>low</sup>tdTomato<sup>+</sup>, and CXCR5<sup>low</sup>PD-1<sup>low</sup>tdTomato<sup>-</sup> antigen-specific cell populations.

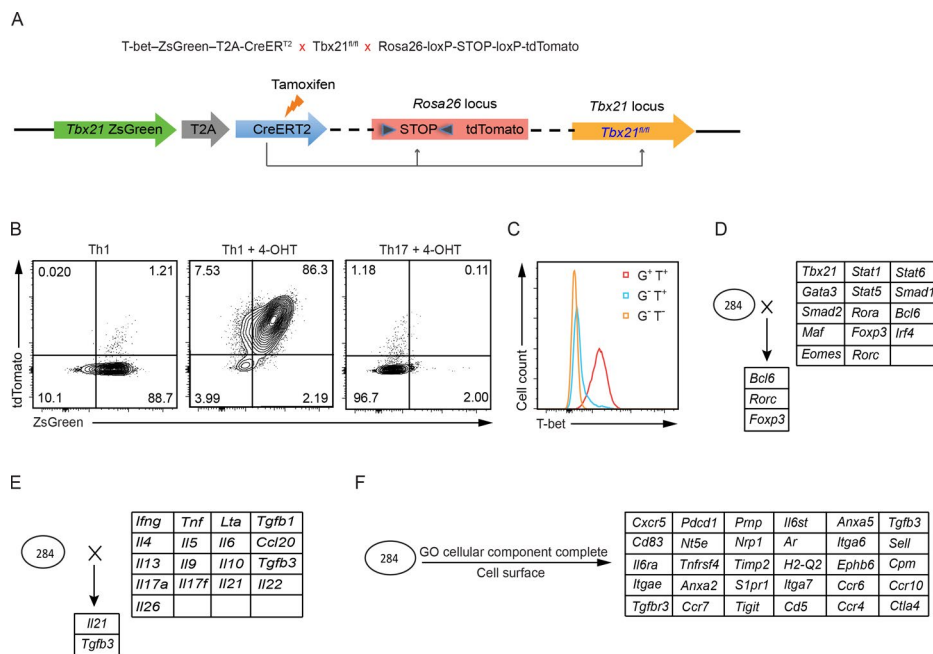

Figure S1. **Generation and characterization of an inducible T-bet fate-mapping mouse strain, and identification of Tfh-related gene expression in the ex-Tbet population.** (A) Genetic modifications of the inducible T-bet fate-mapping or inducible T-bet-deficient mice. TMX-induced Cre whose expression is driven by the *Tbx21* locus can fate-map the T-bet-expressing cells with tdTomato expression or conditionally delete the *Tbx21* gene. (B) Naive CD4 T cells sorted from ZTCE-tdTomato mice were cultured under Th1 or Th17 conditions with or without 4-OHT for 4 d. ZsGreen and tdTomato expression in CD4<sup>+</sup>CD44<sup>high</sup> cells were assessed by flow cytometry. Data are representative of two independent experiments. (C) ZTCE-tdTomato mice were treated (i.p.) with TMX on days 0, 2, and 5. After 10 d, CD4<sup>+</sup>CD44<sup>high</sup>CD25<sup>-</sup>ZsGreen<sup>+</sup>tdTomato<sup>+</sup>(G<sup>+</sup>T<sup>+</sup>), ZsGreen<sup>-</sup>tdTomato<sup>+</sup>(G<sup>+</sup>T<sup>-</sup>) and ZsGreen<sup>-</sup>tdTomato<sup>-</sup>(G<sup>-</sup>T<sup>-</sup>) populations were sorted. T-bet protein level was measured by intracellular staining. Data are representative of two independent experiments. (D-F) Comparing to T-bet-expressing (G<sup>+</sup>T<sup>+</sup>) population, 284 genes were up-regulated in ex-Tbet (G<sup>-</sup>T<sup>+</sup>) cells. Overlap of these genes with the transcription factor (D) and cytokine (E) genes that play important roles in T cell differentiation and functions. The cell surface proteins among 284 genes were identified through GO cellular component analysis (F).

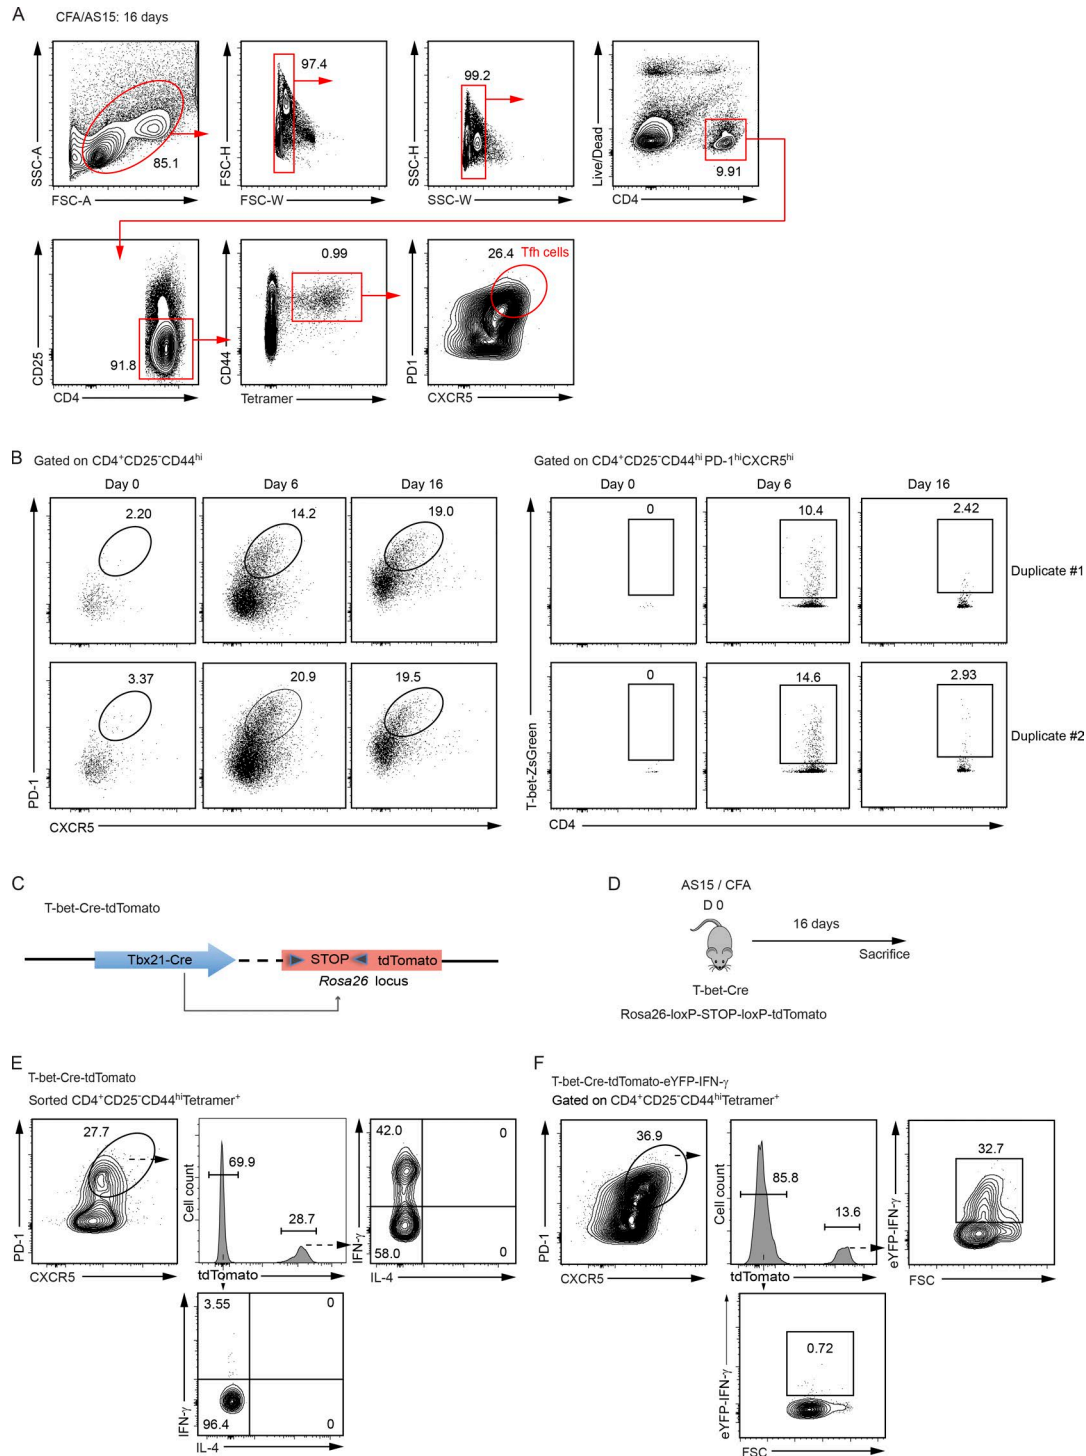

Figure S2. **Tfh cell gating strategy and immunization of constitutive T-bet fate mapping mice.** (A) Gating strategy for identifying antigen-specific Tfh cells after AS15/CFA immunization. (B) Tbet-ZsGreen mice were immunized with AS15/CFA for 6 or 16 d. dLN cells were analyzed by flow cytometry to measure the Tbet-ZsGreen expression among the CD4<sup>+</sup>CD44<sup>hi</sup>CD25<sup>+</sup>PD-1<sup>hi</sup>CXCR5<sup>hi</sup> Tfh population at different time points. Data are representative of two independent experiments. (C) Genetic modifications of the constitutive Tbet fate-mapping mice. Expression of a constitutively active Cre driven by the *Tbx21* locus can fate-map the Tbet-expressing cells with tdTomato expression. (D) Experimental procedure of immunizing Tbet-Cre-tdTomato mice with AS15/CFA. (E) CD4<sup>+</sup>CD44<sup>high</sup>CD25<sup>+</sup>Tetramer<sup>+</sup> cells from AS15/CFA-immunized Tbet-Cre-tdTomato mice were purified and cultured in IL-2 supplemented media overnight. Cytokine production was assessed by intracellular staining 4 h after stimulation with PMA and ionomycin. Data are representative of two independent experiments. (F) Cells from dLN of immunized IFN-γ-eYFP-Tbet-Cre-tdTomato mice were stained with cell surface proteins. eYFP<sup>+</sup> cells among the CD4<sup>+</sup>CD44<sup>high</sup>CD25<sup>+</sup>Tetramer<sup>+</sup>-tdTomato<sup>+</sup> or -tdTomato<sup>-</sup> population were assessed by flow cytometry. Data are representative of three independent experiments.
